# Supplementary material
Source: PubMed Central journal article supplement (PMC2993330)
Supplement: 1008502107_pnas.1008502107_SI.pdf [file 1008502107_pnas.1008502107_SI.pdf]

# Supporting Information

Ciani et al. 10.1073/pnas.1008502107

## SI Methods.

**Peptide Preparations.** Construction, recombinant expression in bacteria, and purification of all the GCN4-p1 variants were performed as described (1). The Cort-Ir variants were prepared by PCR amplification of the entire pET15b-Ir plasmid (2) using oligonucleotide primers that encode the mutated regions. For DNA recircularization and repair, the PCR products were transfected into the MACH1 (Invitrogen) *Escherichia coli* strain. Bacterial expression and purification were performed as described previously (2). Human ATF1-p and its variants were expressed from synthetic genes with optimal codon usage for *E. coli*. The peptides were purified as described (1). GCN4-p1 and ATF1-p peptides contain two (GlySer) and Cort-Ir polypeptide chain fragments harbor four additional residues (HisMetGlySer) at their N termini, which originate from recombinant expression. Peptide stock solutions were prepared in 5 mM sodium phosphate, pH 7.4 supplemented with 150 mM PBS (for solution

studies). Concentrations of peptide samples were determined by tyrosine absorption at 280 nm.

**Crystal Structure Determination.** Crystals of GCN4-pM3 and GCN4-pM7 were grown at 20 °C by mixing equal volumes of proteins (5–15 mg/mL) with reservoir solutions by using the sitting drop method. Crystals grew within 1 d using reservoir solutions containing 0.2 M sodium citrate, 0.1 M sodium cacodylate (pH 6.5), 30% 2-propanol (GCN4-pM3) or 0.1 M Tris-HCl (pH 8.5), 30% (vol/vol) PEG 400 (GCN4-pM7).

Datasets were collected at 100 K by using CuK $\alpha$  radiation produced by a rotating anode generator. Data collection and refinement statistics are given in Table S1. The structures were solved by molecular replacement by using a three-stranded GCN4-p1 variant (PDB ID code 1ZIJ) as a search model. Figures were prepared with PyMOL (DeLano Scientific LLC, [www.pymol.org](http://www.pymol.org)).

1. Harbury PB, Kim PS, Alber T (1994) Crystal structure of an isoleucine-zipper trimer. *Nature* 371:80–83.
2. Frank S, Lustig A, Schulthess T, Engel J, Kammerer RA (2000) A distinct seven-residue trigger sequence is indispensable for proper coiled-coil formation of the human

macrophage scavenger receptor oligomerization domain. *J Biol Chem* 275:11672–11677.

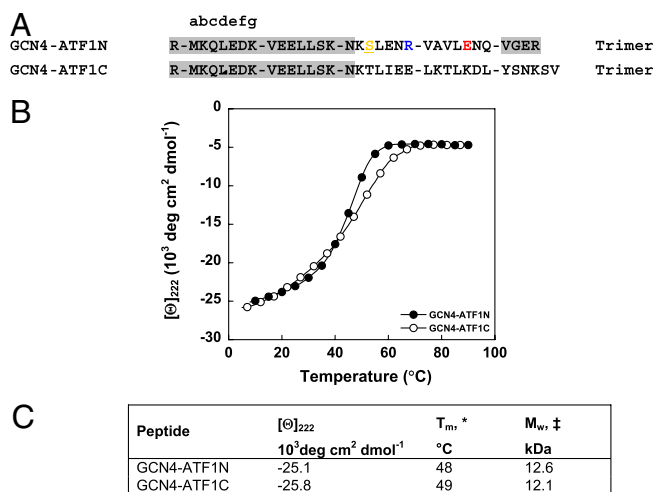

**Fig. S1.** Characterization of GCN4-ATF1 chimeras. (A) Rational design. Details regarding heptad-repeat pattern and color coding of residues are described in Fig. 1A. The sequences originating from GCN4-p1 are highlighted in gray. The oligomerization state of the peptides is indicated on the right. (B) CD analysis. Thermal unfolding profiles recorded by CD at 222 nm of GCN4-ATF1N and GCN4-ATF1C are shown. The experiments were carried out at 35- $\mu$ M peptide concentration (monomer) in PBS (pH 7.4). (C) CD, sedimentation equilibrium analytical ultracentrifugation (AUC), and multiangle light scattering data. \*,  $T_m$  determined at peptide concentrations (monomer) of 35  $\mu$ M; ‡, average molecular masses determined by AUC. The calculated molecular masses of GCN4-ATF1N and GCN4-ATF1C are 4.0 kDa and 4.2 kDa, respectively.
